# Supplementary material for: Antibody-Mediated Inhibition of CTLA4 Aggravates Atherosclerotic Plaque Inflammation and Progression in Hyperlipidemic Mice
Source: PubMed Central journal article supplement (PMC7565685; doi:10.3390/cells9091987), 2020-08-29
Supplement: cells-09-01987-s001.pdf [file cells-09-01987-s001.pdf]

**Figure S1**

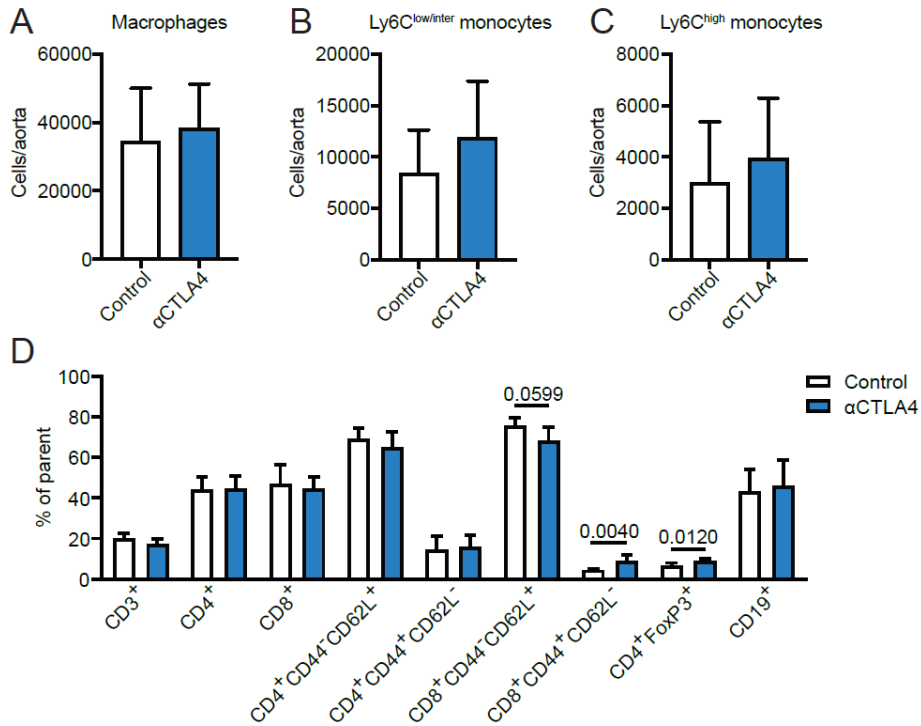

**Figure S1.** Antibody-mediated inhibition of CTLA4 induces an activated T cell profile in hyperlipidemic mice and does not affect monocyte/macrophage-driven inflammation. (A, B, C) Flow cytometry analysis of macrophages and monocytes in the aorta, after αCTLA4 treatment. There is no difference between the groups. (D) In the circulation, flow cytometry analysis indicated an increase in CD8<sup>+</sup>CD44<sup>+</sup>CD62L<sup>-</sup> effector memory cells and an increase in CD4<sup>+</sup>FoxP3<sup>+</sup> regulatory T cells after αCTLA4 treatment. Other T cell populations and B cells were not affected.

**Figure S2:**

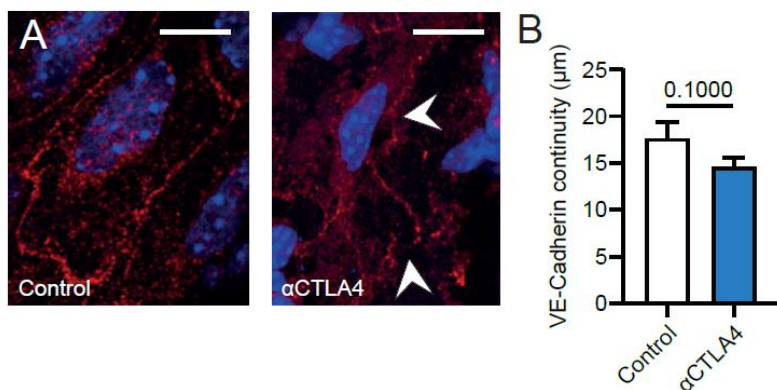

**Figure S2.** (A) Representative pictures of the en face expression of VE-cadherin on the endothelium of the abdominal aorta. Arrow heads indicate disrupted cell-cell junctions. Scale bar: 10 μm. (B) Quantification of VE-cadherin continuity by confocal microscopy on the endothelium of the abdominal aorta (*n* = 3).

**Figure S3**

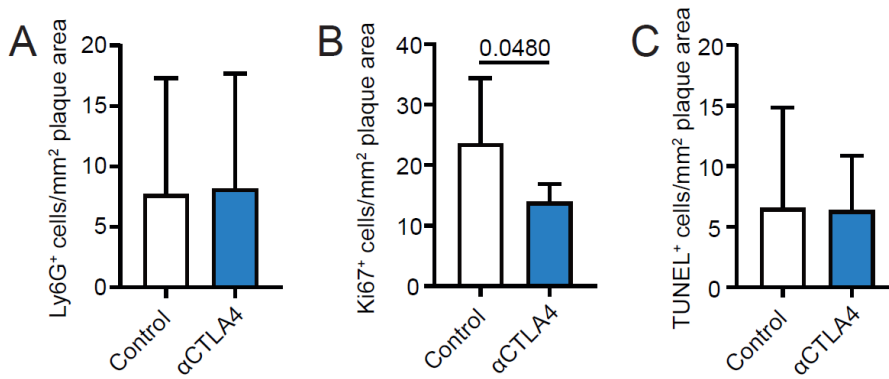

**Figure S3.** Additional immunohistochemical quantifications of the aortic arch. (A) Quantification of Ly6G<sup>+</sup> neutrophils in the plaque. (B) Quantification of Ki67<sup>+</sup> proliferating cells in the plaque. (C) Quantification of TUNEL<sup>+</sup> apoptotic cells.

**Figure S4:**

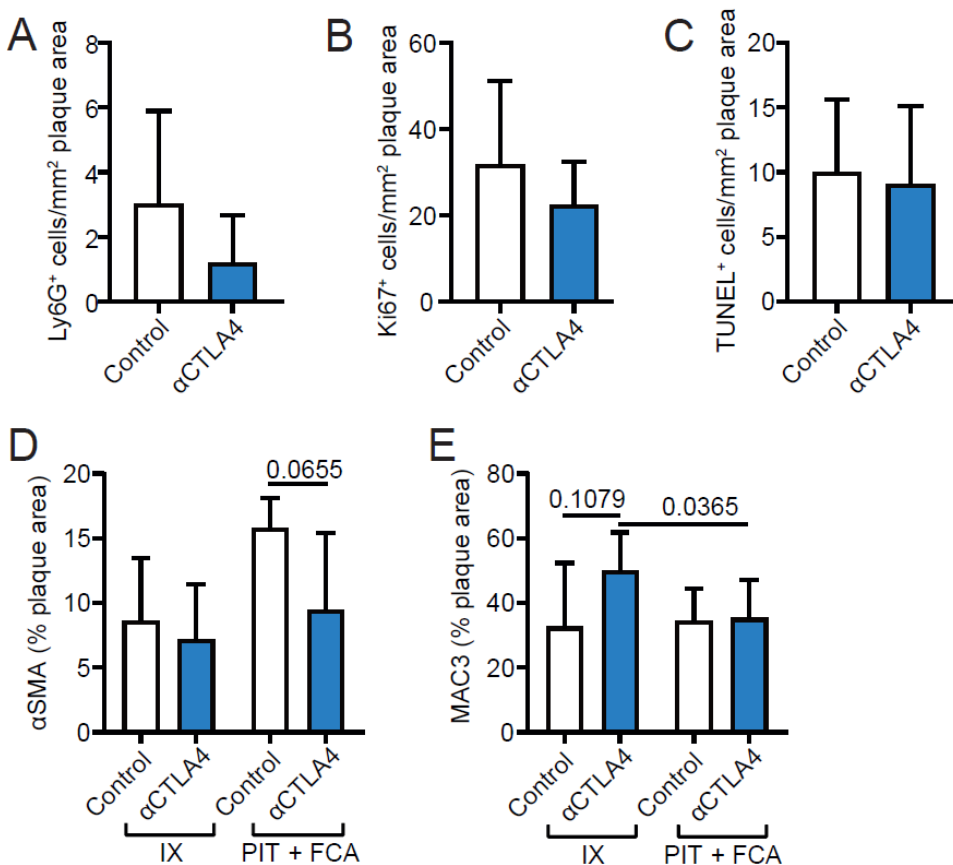

**Figure 4.** Additional immunohistochemical quantifications of the aortic root. (A) Quantification of Ly6G<sup>+</sup> neutrophils in the plaque. (B) Quantification of Ki67<sup>+</sup> proliferating cells in the plaque. (C) Quantification of TUNEL<sup>+</sup> apoptotic cells. (D) Quantification of  $\alpha$ SMA per plaque phenotype. (E) Quantification of MAC3 per plaque phenotype.
